# Supplementary material for: An association study in the Taiwan Biobank elicits three novel candidates for cognitive aging in old adults: NCAM1, TTC12 and ZBTB20
Source: publisher site journal article supplement (doi:10.18632/aging.203321), 2021-07-20
Supplement: Supplementary file [file aging-v13i14-203321-supplementary-material-SD1.pdf]

## SUPPLEMENTARY FIGURES

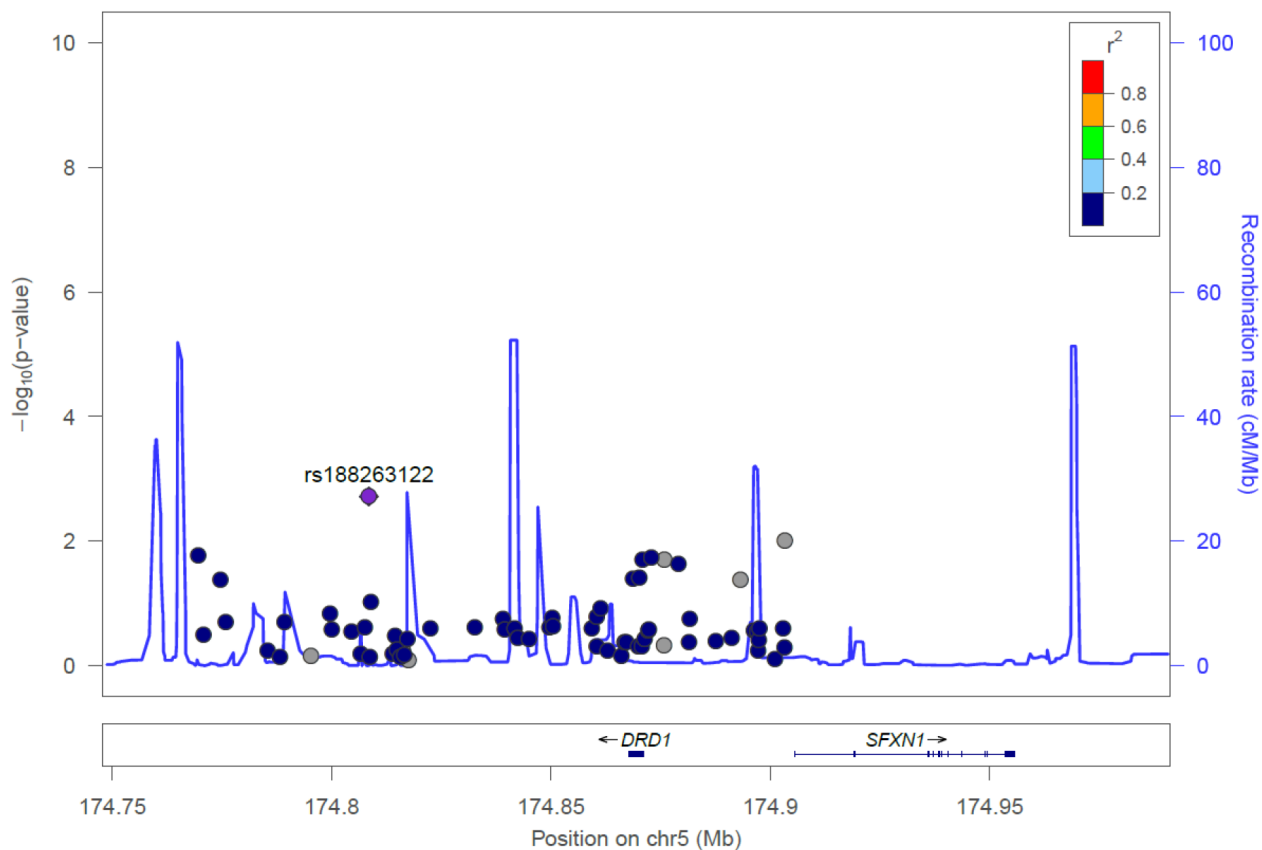

**Supplementary Figure 1. Locus zoom plot for the *DRD1* locus for cognitive aging in the Taiwan Biobank.** SNPs are shown by their position on the chromosome against their association ( $-\log_{10} P$ ) with cognitive aging. SNPs are colored to reflect their linkage disequilibrium with the top SNP (rs188263122) near *DRD1* (*ARL2BPP6-DRD1*). Estimated recombination rates are plotted in cyan using Asian subjects from the 1000 Genomes Project. This plot was generated using LocusZoom.

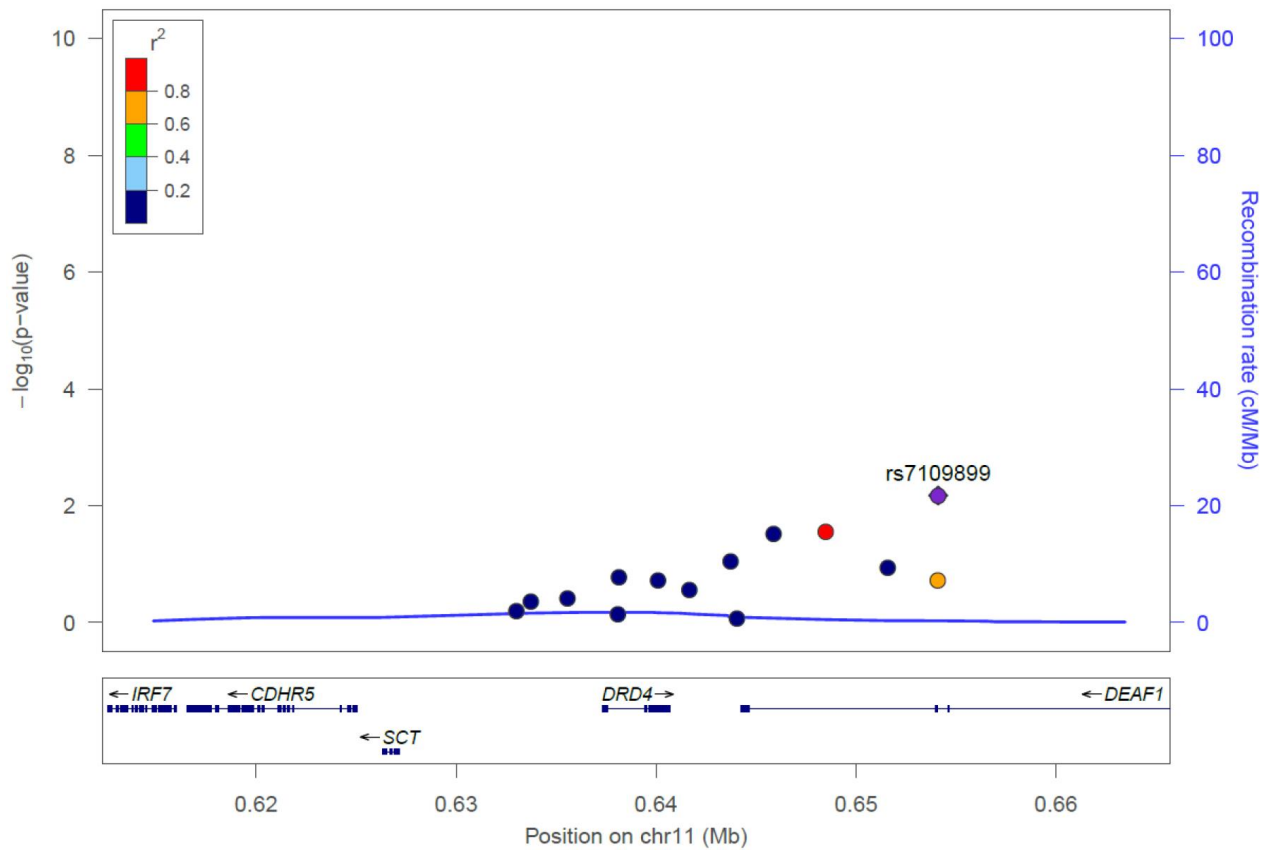

**Supplementary Figure 2. Locus zoom plot for the *DRD4* locus for cognitive aging in the Taiwan Biobank.** SNPs are shown by their position on the chromosome against their association ( $-\log_{10} P$ ) with cognitive aging. SNPs are colored to reflect their linkage disequilibrium with the top SNP (rs7109899) near *DRD4* (*DRD4-DEAF1*). Estimated recombination rates are plotted in cyan using Asian subjects from the 1000 Genomes Project. This plot was generated using LocusZoom.

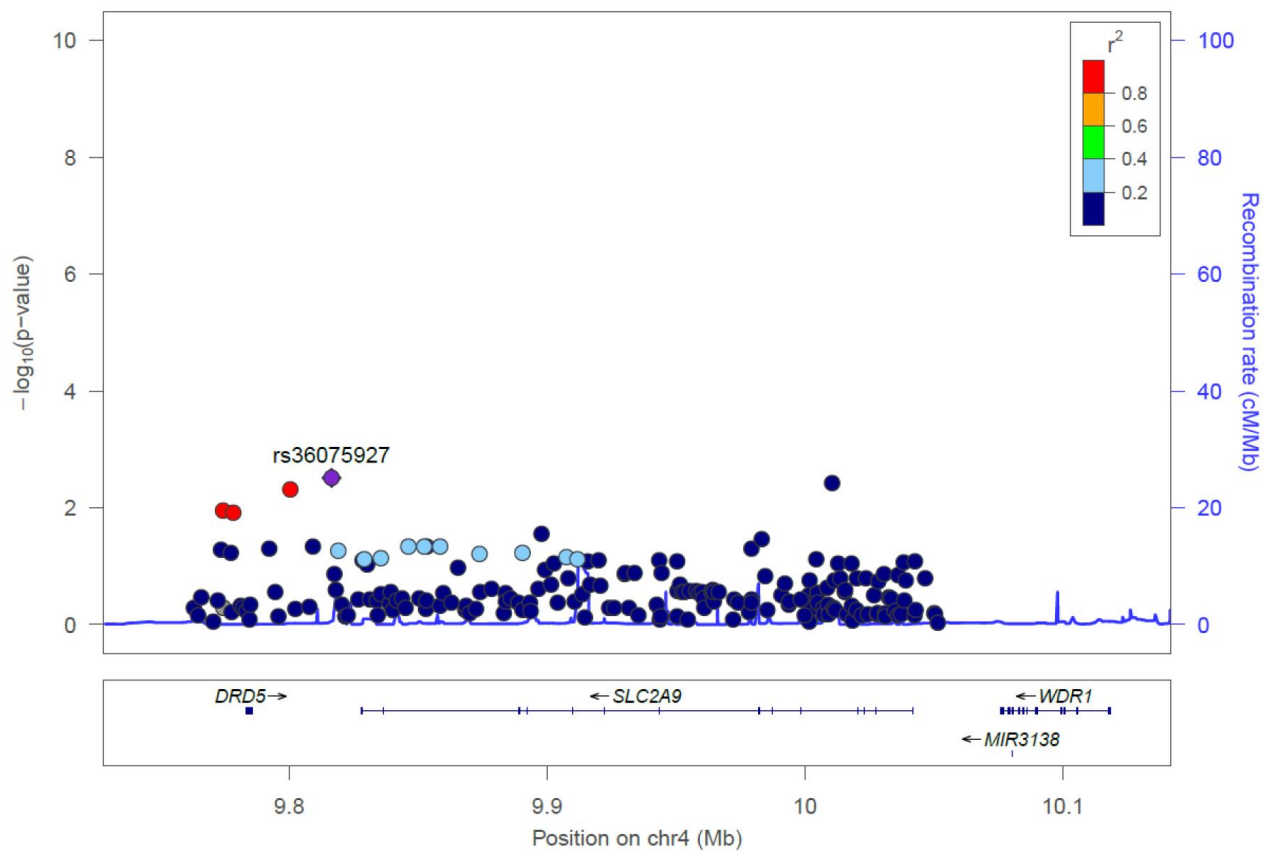

**Supplementary Figure 3. Locus zoom plot for the *DRD5-SLC2A9* locus for cognitive aging in the Taiwan Biobank.** SNPs are shown by their position on the chromosome against their association ( $-\log_{10} P$ ) with cognitive aging. SNPs are colored to reflect their linkage disequilibrium with the top SNP (rs36075927) in *SLC2A9*. Estimated recombination rates are plotted in cyan using Asian subjects from the 1000 Genomes Project. This plot was generated using LocusZoom.
